# Supplementary material
Source: PubMed Central journal article supplement (PMC6277537)
Supplement: mmc1.pdf [file mmc1.pdf]

**Supplemental Information**

**miR-30 Family Reduction Maintains Self-Renewal  
and Promotes Tumorigenesis in NSCLC-Initiating  
Cells by Targeting Oncogene TM4SF1**

**Yu-Shui Ma, Fei Yu, Xiao-Ming Zhong, Gai-Xia Lu, Xian-Ling Cong, Shao-Bo Xue, Wen-Ting Xie, Li-Kun Hou, Li-Juan Pang, Wei Wu, Wei Zhang, Le-Le Cong, Tie Liu, Hui-Deng Long, Ran Sun, Hong-Yan Sun, Zhong-Wei Lv, Chun-Yan Wu, and Da Fu**

## Supplementary Figure and Legends

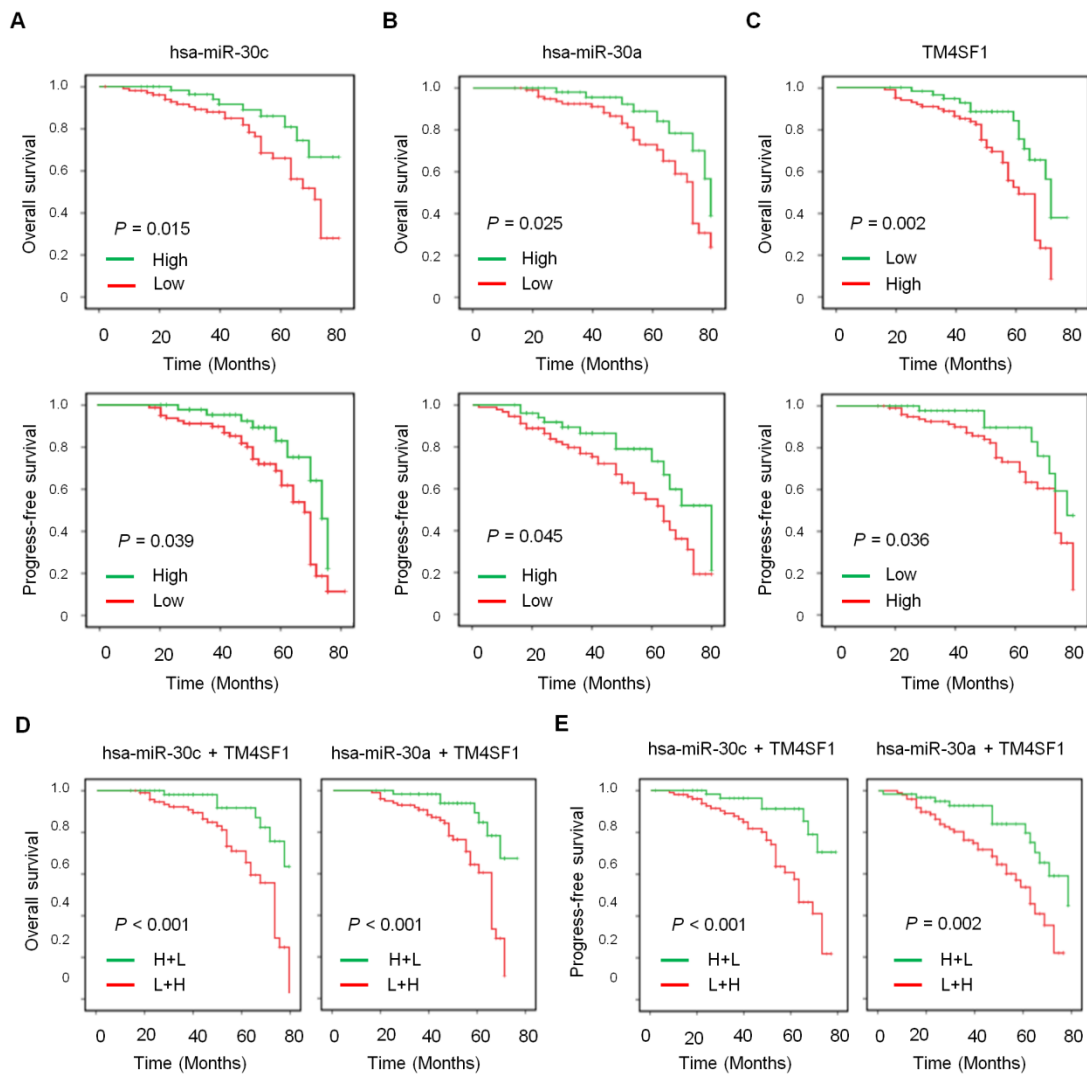

**Fig. S1. Clinical significance of MiR-30c/a and TM4SF1 in NSCLC. (A)**

Kaplan-Meier survival analysis to evaluate the OS and PFS of miR-30c expression in NSCLC patients. (B) Kaplan-Meier survival analysis to evaluate the OS and PFS of miR-30a expression in NSCLC patients. (C) Kaplan-Meier survival analysis to evaluate the OS and PFS of TM4SF1 expression in NSCLC patients. (D) Kaplan-Meier survival analysis to evaluate the OS and PFS of miR-30c/a combined with TM4SF1 expression in NSCLC.
